# Supplementary material for: Ineffective Degradation of Immunogenic Gluten Epitopes by Currently Available Digestive Enzyme Supplements
Source: PubMed Central journal article supplement (PMC4452362; doi:10.1371/journal.pone.0128065), 2015-06-01
Supplement: pone.0128065.s004.pdf [file pone.0128065.s004.pdf]

**S4 Fig. Degradation of 26-mer by AN-PEP and digestive enzyme supplement.** 26-mer peptide was incubated for 30 min with 1/100 capsule equivalent of AN-PEP (A) or with 1 capsule equivalent of Supplement A (B) at 10 different pHs 2-11. **A**, The peptides with m/z 504 (1+), 616 (1+) and 857 (1+) are short breakdown products derived from the 26-mer; a peptide with less than 8 amino acids is too short to contain an epitope. The small amounts of 679 (2+) and 1154 (2+) peptides disappear after prolonged treatment with AN-PEP. **B**, The peptides with m/z 963 (3+) and 1001 (3+) still contain all three epitopes of the 26-mer 1049 (3+). Degradation patterns of the other 4 enzyme supplements are very similar to that of Supplement A. Epitope-containing peptides are marked with a dot (epitopes are underlined). Because of ammonia adduct formation, peptides resolve into several closely spaced peaks. The m/z values in the spectra correspond to the most intense species; the m/z next to sequences correspond to the monoisotopic mass.

**S4A Fig. Degradation of 26-mer by AN-PEP.**

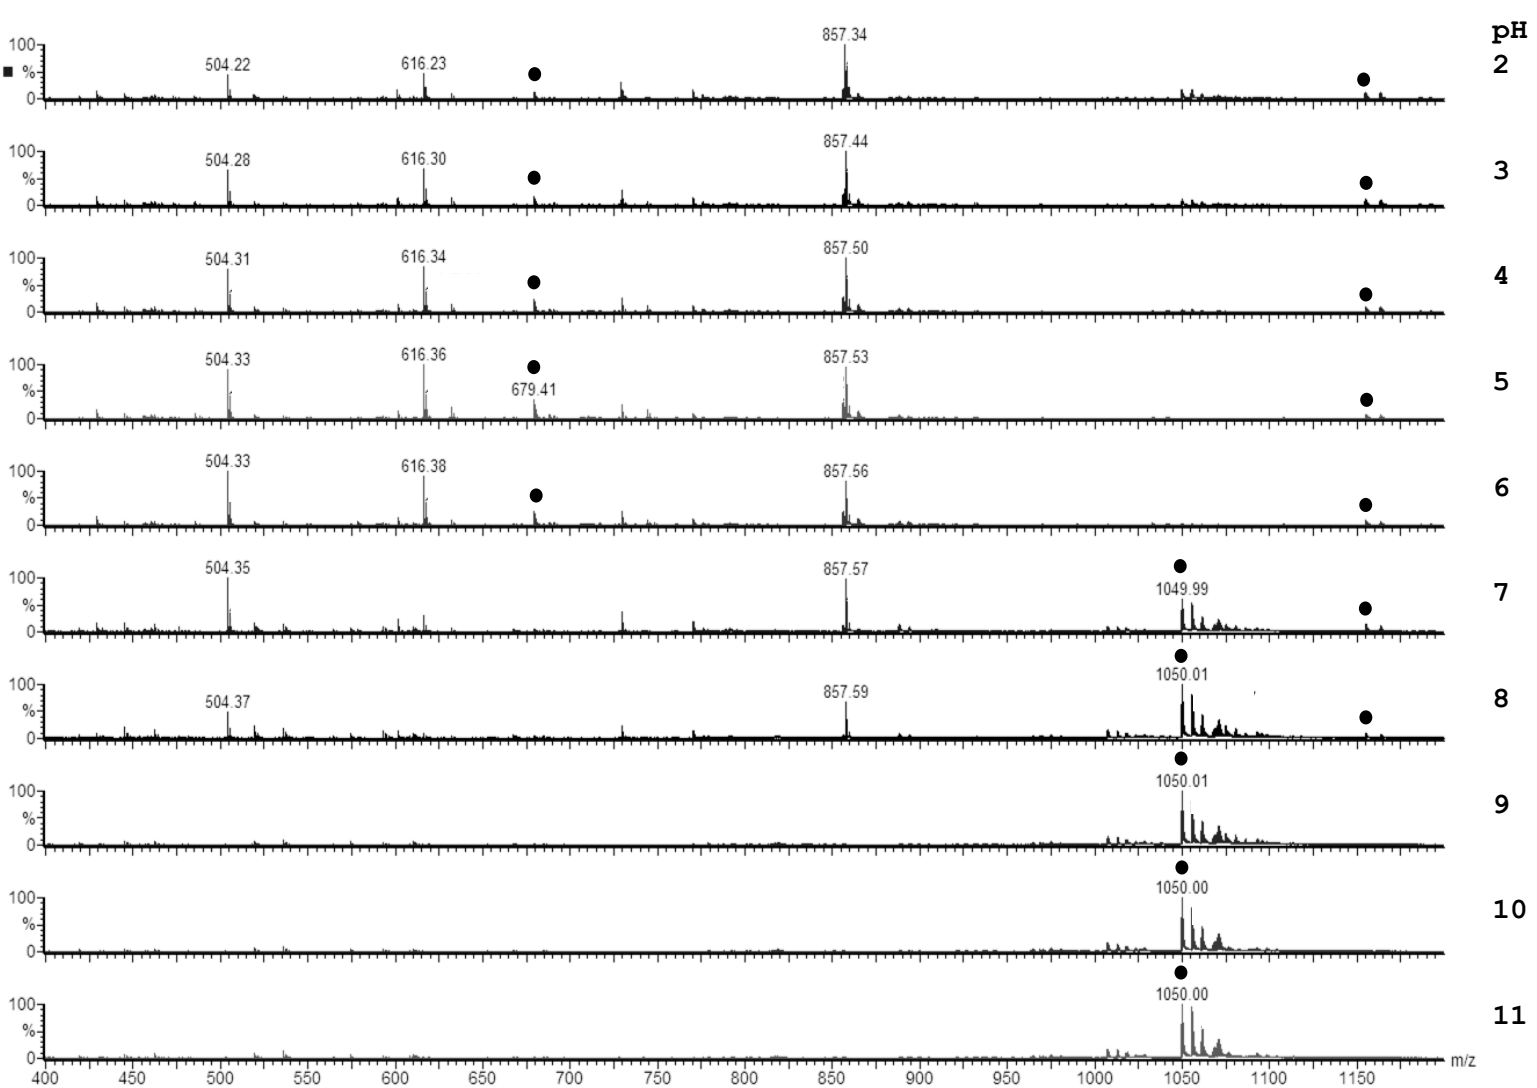

m/z 1049 (3+) 26-mer  
 m/z 1154 (2+)  
 m/z 679 (2+)

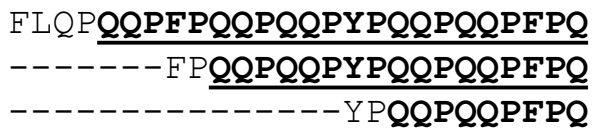

**S4B Fig. Degradation of 26-mer by digestive enzyme Supplement A.**

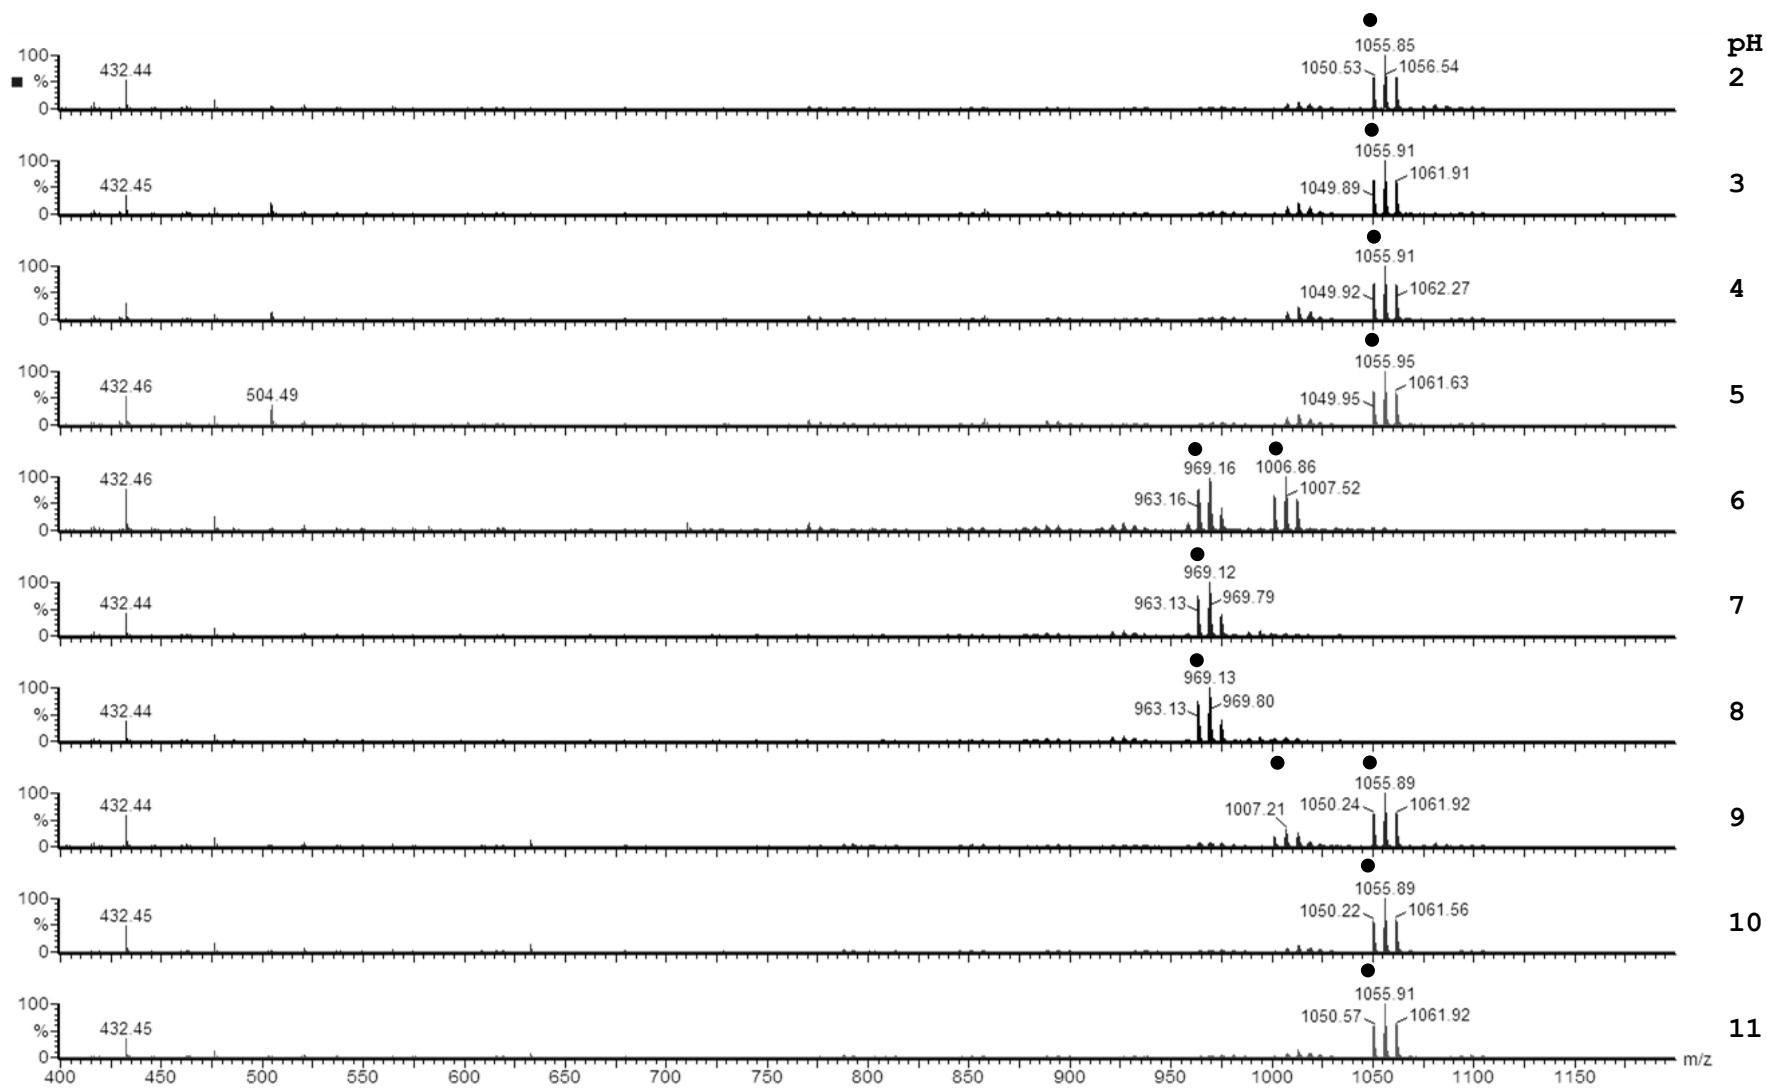

m/z 1049 (3+) 26-mer  
 m/z 1001 (3+) 26-mer-F  
 m/z 963 (3+) 26-mer-FL

FLQPQQPFPPQQPQQPYPPQQPQQPFPPQ  
 -LQPQQPFPPQQPQQPYPPQQPQQPFPPQ  
 --QPQQPFPPQQPQQPYPPQQPQQPFPPQ
