# Supplementary material for: Ineffective Degradation of Immunogenic Gluten Epitopes by Currently Available Digestive Enzyme Supplements
Source: PubMed Central journal article supplement (PMC4452362; doi:10.1371/journal.pone.0128065), 2015-06-01
Supplement: pone.0128065.s005.pdf [file pone.0128065.s005.pdf]

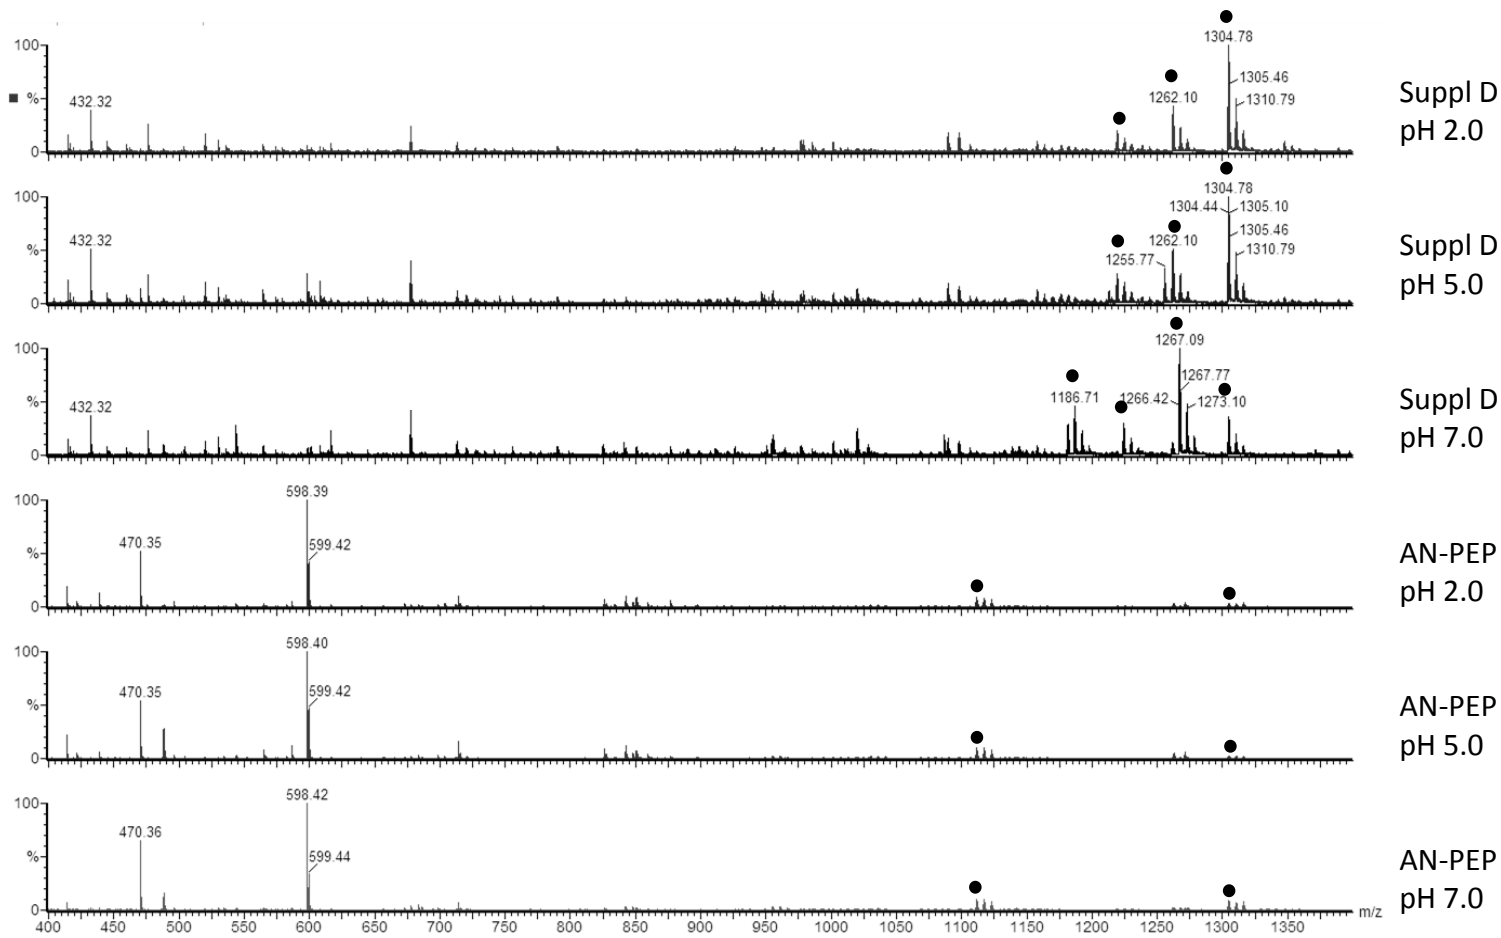

|               |              |                                              |
|---------------|--------------|----------------------------------------------|
| m/z 1304 (3+) | 33-mer       | LQLQ <u>PFFPQQLPYPQPQLPYPQPQLPYPQP</u> QPQPF |
| m/z 1267 (3+) | 33-mer-L     | -QLQ <u>PFFPQQLPYPQPQLPYPQPQLPYPQP</u> QPQPF |
| m/z 1224 (3+) | 33-mer-LQ    | --LQ <u>PFFPQQLPYPQPQLPYPQPQLPYPQP</u> QPQPF |
| m/z 1187 (3+) | 33-mer-LQL   | ---Q <u>PFFPQQLPYPQPQLPYPQPQLPYPQP</u> QPQPF |
| m/z 1111 (3+) | 33-mer-LQLQP | ----F <u>PQPQLPYPQPQLPYPQPQLPYPQP</u> QPQPF  |

**S5 Fig. Degradation of 33-mer by digestive enzyme supplement D and AN-PEP.** 33-mer peptide was incubated for 30 min with 1 capsule equivalent of digestive enzyme supplement or 1/100 capsule equivalent of AN-PEP at pH 2.0, 5.0 and 7.0 as shown. Peptides were analyzed by LC-MS as detailed in S2 Text Methods. Peptides containing epitopes are marked with a dot. The small residual amounts of 33-mer and 33-mer-LQLQP m/z 1111 (3+) in the case of AN-PEP disappear after prolonged treatment. Because of ammonia adduct formation, peptides resolve into several closely spaced peaks (see also S4 Fig.). Degradation patterns of the other 4 digestive enzyme supplements are very similar to that of Supplement D.
