# Supplementary material for: Ineffective Degradation of Immunogenic Gluten Epitopes by Currently Available Digestive Enzyme Supplements
Source: PubMed Central journal article supplement (PMC4452362; doi:10.1371/journal.pone.0128065), 2015-06-01
Supplement: pone.0128065.s006.pdf [file pone.0128065.s006.pdf]

## S1 Table. Calculation of capsule equivalents

| Digestive enzyme | Capsule content (mg) | 1/100 capsule equivalent (ng) | 1/10 capsule equivalent (µg) | 1 capsule equivalent (µg) | 10 capsule equivalent (µg) |
|------------------|----------------------|-------------------------------|------------------------------|---------------------------|----------------------------|
| supplement A     | 695                  | 253                           | 2.53                         | 25.3                      | 253                        |
| supplement B     | 335                  | 122                           | 1.22                         | 12.2                      | 122                        |
| supplement C     | 465                  | 169                           | 1.69                         | 16.9                      | 169                        |
| supplement D     | 395                  | 144                           | 1.44                         | 14.4                      | 144                        |
| supplement E     | 425                  | 155                           | 1.55                         | 15.5                      | 155                        |
| AN-PEP           | 275*                 | 100                           | 1.00                         | 10.0                      | 100                        |

\*AN-PEP is at present not commercially available in the form of a capsule; 275 mg is the intended capsule content; an amount of 100 ng AN-PEP compares to 1/100 capsule equivalent in the downscaled (27,500 x) assay.

Capsule equivalents for digestive enzyme supplements were corrected for capsule content using a  $x = \frac{a \cdot b}{c}$ , where  $a=100$  ng, the optimal amount AN-PEP;  $b$  is the capsule content of enzyme supplements in mg; and  $c=275$  mg, the intended capsule content for AN-PEP
