# Supplementary material for: Ineffective Degradation of Immunogenic Gluten Epitopes by Currently Available Digestive Enzyme Supplements
Source: PubMed Central journal article supplement (PMC4452362; doi:10.1371/journal.pone.0128065), 2015-06-01
Supplement: pone.0128065.s007.pdf [file pone.0128065.s007.pdf]

## **S1 Text. Formulation of selected enzyme supplements**

Supplement A: DPPIV (90 000 HUT), Protease (10 000 HUT)[**32,700 HUT**], Pepsin

Supplement B: DPPIV 100mg, Protease (30 000 HUT)[**70,400 HUT**]

Supplement C: DPPIV/Protease blend (140 000 HUT)

Supplement D: DPPIV (1000 DPPU), Protease (90 000 HUT)[**115,000 HUT**]

Supplement E: DPPIV (500 DPPU), Protease (40 000 HUT), Peptidase (20 000 HUT)[**34,400 HUT**], ANPEP (6000 HUT)

In bold and in brackets is HUT activity/capsule as measured in our assays.

Typically recommended dosages is 1-2 capsules prior to a meal.

Next to proteases, all supplements also contain one or more carbohydrate degrading enzymes, like amylase.

Activity numbers are rounded.
